# Supplementary material for: Origin and evolution of lysyl oxidases
Source: PubMed Central journal article supplement (PMC4448552; doi:10.1038/srep10568), 2015-05-29
Supplement: srep10568-s1.pdf [file srep10568-s1.pdf]

## **Origin and evolution of lysyl oxidases**

Xavier Grau-Bové<sup>1</sup>, Iñaki Ruiz-Trillo<sup>1,3,4</sup>, Fernando Rodriguez-Pascual<sup>2</sup>

<sup>1</sup> Institut de Biologia Evolutiva (CSIC-Universitat Pompeu Fabra), Barcelona, Spain

<sup>2</sup> Centro de Biología Molecular “Severo Ochoa” Consejo Superior de Investigaciones Científicas (C.S.I.C.) / Universidad Autónoma de Madrid (Madrid), Madrid, Spain

<sup>3</sup> Departament de Genètica, Universitat de Barcelona, Barcelona, Spain

<sup>4</sup> Institució Catalana de Recerca i Estudis Avançats (ICREA), Barcelona, Spain

### **Supplementary Material**

**Tables S1 and S2.**

**Files S1 to S8.**

## Figure legends

**Table S1.** Taxon sampling used in the eukaryotic+prokaryotic phylogenies. It includes the taxonomic classification, the acronym used in the present study (in brackets) and the source of the proteome data.

**Table S2.** Extended sampling of animal genomes, used in the holozoan phylogenies. It includes the taxonomic classification, the acronym used in the present study (in brackets) and the source of the proteome data.

**File S1.** Maximum likelihood (ML) phylogenetic tree of 154 eukaryotic and prokaryotic LOX, using dataset from supplementary Table S1 and prokaryote genomes (see Materials and Methods). Trees rooted using the midpoint-rooted tree option. Bootstrap supports are indicated at each node. Sequences are color-coded according to taxonomic assignment (see legend).

**File S2.** Bayesian inference (BI) phylogenetic tree of 154 eukaryotic and prokaryotic LOX, using dataset from supplementary Table S1 and prokaryote genomes (see Materials and Methods). Trees rooted using the midpoint-rooted tree option. Bayesian Posterior Probabilities are indicated at each node. Sequences are color-coded according to taxonomic assignment (see legend).

**File S3.** Maximum likelihood (ML) phylogenetic tree of 129 metazoan and ichthyosporean LOX, using dataset from supplementary Table S2 and ichthyosporean genomes (see Materials and Methods). Trees rooted using the midpoint-rooted tree option. Bootstrap supports are indicated at each node. Sequences are color-coded according to taxonomic assignment (see legend).

**File S4.** Bayesian inference (ML) phylogenetic tree of 129 metazoan and ichthyosporean LOX, using dataset from supplementary Table S2 and ichthyosporean genomes (see Materials and Methods). Trees rooted using the midpoint-rooted tree option. Bayesian Posterior Probabilities are indicated at each node. Sequences are color-coded according to taxonomic assignment (see legend).

**File S5.** Fasta file with 154 eukaryotic and prokaryotic LOX sequences (complete proteins), extracted from dataset from supplementary Table S1 and prokaryote genomes (see Materials and Methods).

**File S6.** Fasta file with 129 metazoan and ichthyosporean LOX sequences (complete proteins), extracted from dataset from supplementary Table S2 and ichthyosporean genomes (see Materials and Methods).

**File S7.** GFF (General Feature Format) file showing molecular features in the protein domain architectures of sequences in File S5 (154 eukaryotic and prokaryotic LOX sequences).

**File S8.** GFF (General Feature Format) file showing molecular features in the protein domain architectures of sequences in File S6 (129 metazoan and ichthyosporean LOX sequences).

Table S1

| Taxonomic classification | Species                                | Source                                                                                                                                                                                                           |                                                                                                                                                                                                                                |
|--------------------------|----------------------------------------|------------------------------------------------------------------------------------------------------------------------------------------------------------------------------------------------------------------|--------------------------------------------------------------------------------------------------------------------------------------------------------------------------------------------------------------------------------|
| <b>METAZOA</b>           | Deuterostomia                          | <i>Homo sapiens (Hsap)</i>                                                                                                                                                                                       | Ensembl                                                                                                                                                                                                                        |
|                          |                                        | <i>Ciona intestinalis (Cint)</i>                                                                                                                                                                                 | Ensembl                                                                                                                                                                                                                        |
|                          |                                        | <i>Saccoglossus kowalevskii (Skow)</i>                                                                                                                                                                           | NCBI                                                                                                                                                                                                                           |
|                          |                                        | <i>Strongylocentrotus purpuratus (Spur)</i>                                                                                                                                                                      | NCBI                                                                                                                                                                                                                           |
|                          | Ecdysozoa                              | <i>Drosophila melanogaster (Dmel)</i>                                                                                                                                                                            | Flybase<br><a href="http://flybase.org/">http://flybase.org/</a>                                                                                                                                                               |
|                          |                                        | <i>Caenorhabditis elegans (Cele)</i>                                                                                                                                                                             | Ensembl                                                                                                                                                                                                                        |
|                          | Lophotrochozoa                         | <i>Capitella teleta (Ctel)</i>                                                                                                                                                                                   | JGI                                                                                                                                                                                                                            |
|                          |                                        | <i>Echinococcus multilocularis (Emul)</i>                                                                                                                                                                        | Wellcome Trust Sanger Institute<br><a href="http://www.sanger.ac.uk/resources/downloads/helminths/echinococcus-multilocularis.html">http://www.sanger.ac.uk/resources/downloads/helminths/echinococcus-multilocularis.html</a> |
|                          |                                        | <i>Lottia gigantea (Lgig)</i>                                                                                                                                                                                    | JGI<br><a href="http://genome.jgi.doe.gov/">http://genome.jgi.doe.gov/</a>                                                                                                                                                     |
|                          |                                        | <i>Crassostrea gigas (Cgig)</i>                                                                                                                                                                                  | Oyster Genome Project webpage <a href="http://www.oysterdb.cn">http://www.oysterdb.cn</a>                                                                                                                                      |
|                          | Cnidaria                               | <i>Nematostella vectensis (Nvec)</i>                                                                                                                                                                             | NCBI                                                                                                                                                                                                                           |
|                          |                                        | <i>Acropora digitifera (Adig)</i>                                                                                                                                                                                | <i>Acropora digitifera</i> Genome Project webpage<br><a href="http://marinegenomics.oist.jp/">http://marinegenomics.oist.jp/</a>                                                                                               |
|                          |                                        | <i>Hydra magnipapillata (Hmag)</i>                                                                                                                                                                               | NCBI                                                                                                                                                                                                                           |
|                          | Placozoa                               | <i>Trichoplax adhaerens (Tadh)</i>                                                                                                                                                                               | NCBI                                                                                                                                                                                                                           |
|                          | Ctenophora                             | <i>Mnemiopsis leidyi (Mlei)</i>                                                                                                                                                                                  | <i>M. leidyi</i> Genome Project webpage<br><a href="http://research.nhgri.nih.gov/mnemiopsis/">http://research.nhgri.nih.gov/mnemiopsis/</a>                                                                                   |
|                          | Porifera                               | <i>Oscarella carmela (Ocar)</i>                                                                                                                                                                                  | Courtesy of Scott Nichols                                                                                                                                                                                                      |
|                          |                                        | <i>Amphimedon queenslandica (Aque)</i>                                                                                                                                                                           | NCBI                                                                                                                                                                                                                           |
|                          |                                        | <i>Sycon ciliatum (Scil)</i>                                                                                                                                                                                     | Courtesy of Maja Adamska                                                                                                                                                                                                       |
|                          |                                        | <i>Leucosolenia complicate (Lcom)</i>                                                                                                                                                                            | Courtesy of Maja Adamska                                                                                                                                                                                                       |
|                          |                                        | <i>Monosiga brevicollis (Mbre)</i>                                                                                                                                                                               | NCBI                                                                                                                                                                                                                           |
| <b>CHOANOFLAGELLATA</b>  | <i>Salpingoeca rosetta (Sros)</i>      | Broad Institute<br><a href="http://www.broadinstitute.org/annotation/genome/multicellularity_project/MultiHome.html">http://www.broadinstitute.org/annotation/genome/multicellularity_project/MultiHome.html</a> |                                                                                                                                                                                                                                |
|                          | <i>Capsaspora owczarzaki (Cowc)</i>    | Broad Institute                                                                                                                                                                                                  |                                                                                                                                                                                                                                |
| <b>FILASTEREA</b>        | <i>Ministeria vibrans (Mvib)</i>       | RNASeq data                                                                                                                                                                                                      |                                                                                                                                                                                                                                |
|                          | <i>Sphaeroforma arctica (Sarc)</i>     | Broad Institute                                                                                                                                                                                                  |                                                                                                                                                                                                                                |
| <b>ICHTHYOSPOREA</b>     | <i>Creolimax fragrantissima (Cfra)</i> | Beijing Genome Institute (Beijing, PRC)                                                                                                                                                                          |                                                                                                                                                                                                                                |
|                          | <i>Abeoforma whisleri (Awhi)</i>       | RNASeq data                                                                                                                                                                                                      |                                                                                                                                                                                                                                |
|                          | <i>Pirum gemmata (Pgem)</i>            | RNASeq data                                                                                                                                                                                                      |                                                                                                                                                                                                                                |
|                          | <i>Amoebidium parasiticum (Apar)</i>   | RNASeq data                                                                                                                                                                                                      |                                                                                                                                                                                                                                |
|                          | <i>Incertae sedis</i>                  | <i>Corallochytrium limacisporum (Clim)</i>                                                                                                                                                                       | The Genome Analysis Centre (Norwich, UK)                                                                                                                                                                                       |
| <b>FUNGI</b>             | Ascomycota                             | <i>Schizosaccharomyces pombe (Spom)</i>                                                                                                                                                                          | NCBI                                                                                                                                                                                                                           |
|                          |                                        | <i>Tuber melanosporum (Tmel)</i>                                                                                                                                                                                 | NCBI                                                                                                                                                                                                                           |
|                          |                                        | <i>Neurospora crassa (Ncra)</i>                                                                                                                                                                                  | Broad Institute<br><a href="http://www.broadinstitute.org/scientific-community/science/projects/fungal-genome-initiative">http://www.broadinstitute.org/scientific-community/science/projects/fungal-genome-initiative</a>     |
|                          | Basidiomycota                          | <i>Saccharomyces cerevisiae (Scer)</i>                                                                                                                                                                           | Broad Institute                                                                                                                                                                                                                |
|                          |                                        | <i>Cryptococcus neoformans (Cneo)</i>                                                                                                                                                                            | NCBI                                                                                                                                                                                                                           |
|                          |                                        | <i>Coprinopsis cinerea (Ccin)</i>                                                                                                                                                                                | Broad Institute                                                                                                                                                                                                                |
|                          | <i>Incertae sedis</i>                  | <i>Ustilago maydis (Umay)</i>                                                                                                                                                                                    | NCBI                                                                                                                                                                                                                           |
|                          |                                        | <i>Mortierella verticillata (Mver)</i>                                                                                                                                                                           | Broad Institute                                                                                                                                                                                                                |
|                          | Mucoromycotina                         | <i>Phyomyces blakesleeanus (Pbla)</i>                                                                                                                                                                            | JGI                                                                                                                                                                                                                            |
|                          |                                        | <i>Mucor circinelloides (Mcir)</i>                                                                                                                                                                               | JGI                                                                                                                                                                                                                            |
|                          |                                        | <i>Rhizopus oryzae (Rory)</i>                                                                                                                                                                                    | Broad Institute                                                                                                                                                                                                                |
|                          |                                        | <i>Umbelopsis ramanniana (Umar)</i>                                                                                                                                                                              | JGI Fungi Portal<br><i>Fueling the future with fungal genomics</i> , I Grigoriev et al., Mycology 2011                                                                                                                         |
|                          | Blastocladiomycota                     | <i>Allomyces macrogynus (Amac)</i>                                                                                                                                                                               | Broad Institute                                                                                                                                                                                                                |
|                          |                                        | <i>Catenaria anguillulae (Cang)</i>                                                                                                                                                                              | JGI Fungi Portal<br><i>Fueling the future with fungal genomics</i> , I Grigoriev et al., Mycology 2011                                                                                                                         |
|                          | Chytridiomycota                        | <i>Batrachochytrium dendrobatidis (Bden)</i>                                                                                                                                                                     | JGI                                                                                                                                                                                                                            |
|                          |                                        | <i>Spizellomyces punctatus (Spun)</i>                                                                                                                                                                            | Broad Institute                                                                                                                                                                                                                |
|                          | Glomeromycota                          | <i>Rhizophagus irregularis (Rirr)</i>                                                                                                                                                                            | JGI Fungi Portal<br><i>Fueling the future with fungal genomics</i> , I Grigoriev et al., Mycology 2011                                                                                                                         |
|                          | Kickxellomycotina                      | <i>Coemansia reversa (Crev)</i>                                                                                                                                                                                  | JGI Fungi Portal<br><i>Fueling the future with fungal genomics</i> , I Grigoriev et al., Mycology 2011                                                                                                                         |
|                          | Entomophthoromycota                    | <i>Conidiobolus coronatus (Ccor)</i>                                                                                                                                                                             | JGI Fungi Portal<br><i>Fueling the future with fungal genomics</i> , I Grigoriev et al., Mycology 2011                                                                                                                         |

|                                         |                           |                                           |                                                                                                                                                                                                                  |
|-----------------------------------------|---------------------------|-------------------------------------------|------------------------------------------------------------------------------------------------------------------------------------------------------------------------------------------------------------------|
|                                         | Monoblepharidomycota      | <i>Gonapodya prolifera</i> (Gpro)         | JGI Fungi Portal<br><i>Fueling the future with fungal genomics</i> , I Grigoriev et al., Mycology 2011                                                                                                           |
|                                         | Neocallimastigomycota     | <i>Piromyces</i> sp. E2 (Pisp)            | JGI Fungi Portal<br><i>Fueling the future with fungal genomics</i> , I Grigoriev et al., Mycology 2011                                                                                                           |
|                                         | Microsporidia             | <i>Encephalitozoon cuniculi</i> (Ecu)     | NCBI                                                                                                                                                                                                             |
|                                         |                           | <i>Nematocida parisii</i> (Npar)          | NCBI                                                                                                                                                                                                             |
|                                         | Cryptomycota              | <i>Rozella allomycis</i> (Rall)           | JGI                                                                                                                                                                                                              |
| <b>NUCLEARIIDAE AND FONTICULA GROUP</b> |                           | <i>Nuclearia</i> spp. (Nspp)              | RNAseq data                                                                                                                                                                                                      |
|                                         |                           | <i>Fonticula alba</i> (Falb)              | Broad Institute<br><a href="http://www.broadinstitute.org/annotation/genome/multicellularity_project/Downloads.html">http://www.broadinstitute.org/annotation/genome/multicellularity_project/Downloads.html</a> |
| <b>APUSOZOA</b>                         |                           | <i>Thecamonas trahens</i> (Ttra)          | Broad Institute<br><a href="http://www.broadinstitute.org/annotation/genome/multicellularity_project/Downloads.html">http://www.broadinstitute.org/annotation/genome/multicellularity_project/Downloads.html</a> |
| <b>AMOEBOZOA</b>                        | Mycetozoa                 | <i>Dictyostelium discoideum</i> (Ddis)    | NCBI                                                                                                                                                                                                             |
|                                         |                           | <i>Polysphondylium pallidum</i> (Ppal)    | NCBI                                                                                                                                                                                                             |
|                                         | Archamoeba                | <i>Entamoeba histolytica</i> (Ehis)       | Wellcome Trust Sanger Institute<br><a href="http://www.sanger.ac.uk/resources/downloads/protozoa/entamoeba.html">http://www.sanger.ac.uk/resources/downloads/protozoa/entamoeba.html</a>                         |
|                                         | Centramoebida             | <i>Acanthamoeba castellanii</i> (Acas)    | <i>Ab initio</i> protein prediction                                                                                                                                                                              |
| <b>VIRIDIPLANTAE</b>                    | Embryophyta               | <i>Arabidopsis thaliana</i> (Atha)        | NCBI                                                                                                                                                                                                             |
|                                         |                           | <i>Mimulus guttatus</i> (Mgut)            | Phytozome (JGI)<br><a href="http://www.phytozome.net/">http://www.phytozome.net/</a>                                                                                                                             |
|                                         |                           | <i>Aquilegia coerulea</i> (Acoe)          | Phytozome (JGI)                                                                                                                                                                                                  |
|                                         |                           | <i>Brachypodium distachyon</i> (Bdis)     | Phytozome (JGI)                                                                                                                                                                                                  |
|                                         |                           | <i>Sorghum bicolor</i> (Sbic)             | Phytozome (JGI)                                                                                                                                                                                                  |
|                                         |                           | <i>Selaginella moellendorffii</i> (Smoe)  | NCBI                                                                                                                                                                                                             |
|                                         |                           | <i>Physcomitrella patens</i> (Ppat)       | NCBI                                                                                                                                                                                                             |
|                                         | Chlorophyta               | <i>Chlamydomonas reinhardtii</i> (Crei)   | NCBI                                                                                                                                                                                                             |
|                                         |                           | <i>Volvox cartieri</i> (Vcar)             | NCBI                                                                                                                                                                                                             |
|                                         |                           | <i>Chlorella variabilis</i> (Cvar)        | NCBI                                                                                                                                                                                                             |
|                                         |                           | <i>Ostreococcus tauri</i> (Otau)          | NCBI                                                                                                                                                                                                             |
|                                         |                           | <i>Micromonas pusilla</i> (Mpus)          | JGI                                                                                                                                                                                                              |
|                                         | Rhodophyta                | <i>Cyanidioschyzon merolae</i> (Cmer)     | <i>C. merolae</i> Genome Project webpage<br><a href="http://merolae.biol.s.u-tokyo.ac.jp/">http://merolae.biol.s.u-tokyo.ac.jp/</a>                                                                              |
|                                         |                           | <i>Chondrus crispus</i> (Ccri)            | <i>C. crispus</i> Genome Project webpage<br>Courtesy of Mark Cock                                                                                                                                                |
|                                         |                           | <i>Pyropia yezoensis</i> (Pyez)           | <i>P. yezoensis</i> Genome Project webpage<br><a href="http://nrifs.fra.affrc.go.jp/ResearchCenter/5_AG/genome/s/nori/">http://nrifs.fra.affrc.go.jp/ResearchCenter/5_AG/genome/s/nori/</a>                      |
|                                         | Glaucophyta               | <i>Cyanophora paradoxa</i> (Cpar)         | <i>C. paradoxa</i> Genome Project webpage<br><a href="http://cyanophora.rutgers.edu/cyanophora/">http://cyanophora.rutgers.edu/cyanophora/</a>                                                                   |
| <b>HETEROKONTA/ STRAMENOPILES</b>       | Brown algae/ Phaeophyceae | <i>Ectocarpus siliculosus</i> (Esil)      | EMBL                                                                                                                                                                                                             |
|                                         |                           | <i>Nannochloropsis gaditana</i> (Ngad)    | <i>N. gaditana</i> Genome Project webpage<br><a href="http://nannochloropsis.genomeprojectsolutions-databases.com/">http://nannochloropsis.genomeprojectsolutions-databases.com/</a>                             |
|                                         |                           | <i>Aureococcus anophagefferens</i> (Aano) | Uniprot                                                                                                                                                                                                          |
|                                         |                           | <i>Phaeodactylum tricorutum</i> (Ptri)    | NCBI                                                                                                                                                                                                             |
|                                         |                           | <i>Thalassiosira pseudonana</i> (Tpse)    | NCBI                                                                                                                                                                                                             |
|                                         | Oomycota                  | <i>Phytophthora infestans</i> (Pinf)      | NCBI                                                                                                                                                                                                             |
|                                         | Labyrinthulomycetes       | <i>Aplanochytrium kerguelense</i> (Aker)  | JGI                                                                                                                                                                                                              |
|                                         |                           | <i>Schizochytrium aggregatum</i> (Sagg)   | JGI                                                                                                                                                                                                              |
| <b>ALVEOLATA</b>                        | Apicomplexa               | <i>Toxoplasma gondii</i> (Tgon)           | NCBI                                                                                                                                                                                                             |
|                                         |                           | <i>Plasmodium falciparum</i> (Pfal)       | Uniprot                                                                                                                                                                                                          |
|                                         | Ciliophora                | <i>Paramecium tetraurelia</i> (Ptet)      | Uniprot                                                                                                                                                                                                          |
|                                         |                           | <i>Tetrahymena thermophila</i> (Tthe)     | NCBI                                                                                                                                                                                                             |
|                                         | Perkinsidae               | <i>Perkinsus marinus</i> (Pmar)           | NCBI                                                                                                                                                                                                             |
|                                         | Dinoflagellata            | <i>Symbiodinium minutum</i> (Smin)        | <i>Symbiodinium minutum</i> Clade B1 Genome Project webpage<br><a href="http://marinegenomics.oist.jp/">http://marinegenomics.oist.jp/</a>                                                                       |
| <b>RHIZARIA</b>                         |                           | <i>Bigelowiella natans</i> (Bnat)         | JGI                                                                                                                                                                                                              |
| <b>HAPTOPHYTA</b>                       |                           | <i>Emiliania huxleyi</i> (Ehux)           | JGI                                                                                                                                                                                                              |
| <b>CRYPTOPHYTA</b>                      |                           | <i>Guillardia theta</i> (Gthe)            | JGI                                                                                                                                                                                                              |
| <b>EXCAVATA</b>                         | Heterolobosea             | <i>Naegleria gruberi</i> (Ngru)           | NCBI                                                                                                                                                                                                             |
|                                         | Kinetoplastida            | <i>Bodo saltans</i> (Bsal)                | Wellcome Trust Sanger Institute<br><a href="http://www.sanger.ac.uk/resources/downloads/protozoa/bodo-saltans.html">http://www.sanger.ac.uk/resources/downloads/protozoa/bodo-saltans.html</a>                   |
|                                         |                           | <i>Trypanosoma cruzi</i> (Tcru)           | NCBI                                                                                                                                                                                                             |
|                                         |                           | <i>Leishmania major</i> (Lmaj)            | NCBI                                                                                                                                                                                                             |
|                                         | Metamonada                | <i>Trichomonas vaginalis</i> (Tvag)       | NCBI                                                                                                                                                                                                             |
|                                         |                           | <i>Giardia lamblia</i> (Glam)             | NCBI                                                                                                                                                                                                             |

Table S2

| Taxonomic classification |                                        | Species                                                                                                                              | Source                                                                                                                                                                                                                         |                                                                                                                                |
|--------------------------|----------------------------------------|--------------------------------------------------------------------------------------------------------------------------------------|--------------------------------------------------------------------------------------------------------------------------------------------------------------------------------------------------------------------------------|--------------------------------------------------------------------------------------------------------------------------------|
| DEUTEROSTOMIA            | Chordata                               | Vertebrata                                                                                                                           | <i>Homo sapiens (Hsap)</i>                                                                                                                                                                                                     | Ensembl                                                                                                                        |
|                          |                                        |                                                                                                                                      | <i>Mus musculus (Mmus)</i>                                                                                                                                                                                                     | Ensembl                                                                                                                        |
|                          |                                        |                                                                                                                                      | <i>Gallus gallus (Ggal)</i>                                                                                                                                                                                                    | Ensembl                                                                                                                        |
|                          |                                        |                                                                                                                                      | <i>Anolis carolinensis (Acar)</i>                                                                                                                                                                                              | Ensembl                                                                                                                        |
|                          |                                        |                                                                                                                                      | <i>Xenopus tropicalis (Xtro)</i>                                                                                                                                                                                               | Ensembl                                                                                                                        |
|                          |                                        |                                                                                                                                      | <i>Danio rerio (Drer)</i>                                                                                                                                                                                                      | Ensembl                                                                                                                        |
|                          |                                        |                                                                                                                                      | <i>Latimeria chalumnae (Lcha)</i>                                                                                                                                                                                              | Ensembl                                                                                                                        |
|                          |                                        |                                                                                                                                      | <i>Callorhynchus milii (Cmil)</i>                                                                                                                                                                                              | Elephant Shark Genome Project<br><a href="http://esharkgenome.imcb.a-star.edu.sg/">http://esharkgenome.imcb.a-star.edu.sg/</a> |
|                          | <i>Petromyzon marinus (Pema)</i>       | Ensembl                                                                                                                              |                                                                                                                                                                                                                                |                                                                                                                                |
|                          | Tunicata                               | <i>Ciona intestinalis (Cint)</i>                                                                                                     | Ensembl                                                                                                                                                                                                                        |                                                                                                                                |
|                          |                                        | <i>Ciona savignyi (Csav)</i>                                                                                                         | Ensembl                                                                                                                                                                                                                        |                                                                                                                                |
|                          |                                        | <i>Oikopleura dioica (Oodio)</i>                                                                                                     | Genoscope<br><a href="http://www.genoscope.cns.fr/externe/GenomeBrowser/Oikopleura/">http://www.genoscope.cns.fr/externe/GenomeBrowser/Oikopleura/</a>                                                                         |                                                                                                                                |
|                          | Cephalochordata                        | <i>Branchiostoma floridae (Bflo)</i>                                                                                                 | JGI                                                                                                                                                                                                                            |                                                                                                                                |
|                          | Ambulacraria                           | Hemichordata                                                                                                                         | <i>Saccoglossus kowalevskii (Skow)</i>                                                                                                                                                                                         | NCBI                                                                                                                           |
| Echinodermata            |                                        | <i>Strongylocentrotus purpuratus (Spur)</i>                                                                                          | NCBI                                                                                                                                                                                                                           |                                                                                                                                |
| ECDYSOZOA                | Arthropoda                             | Hexapoda                                                                                                                             | <i>Drosophila melanogaster (Dmel)</i>                                                                                                                                                                                          | Flybase<br><a href="http://flybase.org/">http://flybase.org/</a>                                                               |
|                          |                                        |                                                                                                                                      | <i>Tribolium castaneum (Tcas)</i>                                                                                                                                                                                              | Beetlebase<br><a href="http://www.beetlebase.org/">http://www.beetlebase.org/</a>                                              |
|                          |                                        | Crustacea                                                                                                                            | <i>Daphnia pulex (Dpul)</i>                                                                                                                                                                                                    | JGI                                                                                                                            |
|                          |                                        | Arachnida                                                                                                                            | <i>Ixodes scapularis (Isca)</i>                                                                                                                                                                                                | NCBI                                                                                                                           |
|                          | Nematoda                               | <i>Caenorhabditis elegans (Cele)</i>                                                                                                 | Ensembl                                                                                                                                                                                                                        |                                                                                                                                |
|                          |                                        | <i>Trichinella spiralis (Tspi)</i>                                                                                                   | NCBI                                                                                                                                                                                                                           |                                                                                                                                |
|                          |                                        | <i>Brugia malayi (Bmal)</i>                                                                                                          | NCBI                                                                                                                                                                                                                           |                                                                                                                                |
| LOPHOTROCHOZOA           | Spiralia                               | Mollusca                                                                                                                             | <i>Lottia gigantea (Lgig)</i>                                                                                                                                                                                                  | JGI<br><a href="http://genome.jgi.doe.gov/">http://genome.jgi.doe.gov/</a>                                                     |
|                          |                                        |                                                                                                                                      | <i>Aplysia californica (Acal)</i>                                                                                                                                                                                              | NCBI                                                                                                                           |
|                          |                                        |                                                                                                                                      | <i>Crassostrea gigas (Cgig)</i>                                                                                                                                                                                                | Oyster Genome Project<br><a href="http://oysterdb.cn/">http://oysterdb.cn/</a>                                                 |
|                          |                                        | Annelida                                                                                                                             | <i>Capitella teleta (Ctel)</i>                                                                                                                                                                                                 | JGI                                                                                                                            |
|                          |                                        |                                                                                                                                      | <i>Helobdella robusta (Hrob)</i>                                                                                                                                                                                               | JGI                                                                                                                            |
|                          | Platyhelminthes                        | <i>Echinococcus multilocularis (Emul)</i>                                                                                            | Wellcome Trust Sanger Institute<br><a href="http://www.sanger.ac.uk/resources/downloads/helminths/echinococcus-multilocularis.html">http://www.sanger.ac.uk/resources/downloads/helminths/echinococcus-multilocularis.html</a> |                                                                                                                                |
|                          |                                        | <i>Schistosoma mansoni (Sman)</i>                                                                                                    | NCBI                                                                                                                                                                                                                           |                                                                                                                                |
| CNIDARIA                 | <i>Nematostella vectensis (Nvec)</i>   | NCBI                                                                                                                                 |                                                                                                                                                                                                                                |                                                                                                                                |
|                          | <i>Acropora digitifera (Adig)</i>      | <i>Acropora digitifera</i> Genome Project<br><a href="http://marinegenomics.oist.jp/">http://marinegenomics.oist.jp/</a>             |                                                                                                                                                                                                                                |                                                                                                                                |
| PLACOZOA                 | <i>Trichoplax adhaerens (Tadh)</i>     | NCBI                                                                                                                                 |                                                                                                                                                                                                                                |                                                                                                                                |
| CTENOPHORA               | <i>Mnemiopsis leidyi (Mlei)</i>        | <i>M. leidyi</i> Genome Project<br><a href="http://research.nhgri.nih.gov/mnemiopsis/">http://research.nhgri.nih.gov/mnemiopsis/</a> |                                                                                                                                                                                                                                |                                                                                                                                |
| PORIFERA                 | <i>Oscarella carmela (Ocar)</i>        | Courtesy of Scott Nichols                                                                                                            |                                                                                                                                                                                                                                |                                                                                                                                |
|                          | <i>Amphimedon queenslandica (Aque)</i> | NCBI                                                                                                                                 |                                                                                                                                                                                                                                |                                                                                                                                |
|                          | <i>Sycon ciliatum (Scil)</i>           | Courtesy of Maja Adamska                                                                                                             |                                                                                                                                                                                                                                |                                                                                                                                |
|                          | <i>Leucosolenia complicata (Lcom)</i>  | Courtesy of Maja Adamska                                                                                                             |                                                                                                                                                                                                                                |                                                                                                                                |

# Figure S1

ML 154 eukaryotes+prokaryotes

- Metazoa
- Ichthyosporia
- Fungi
- Amoebozoa
- Rhodophyta
- Bacteria
- Archaea
- Metagenomic

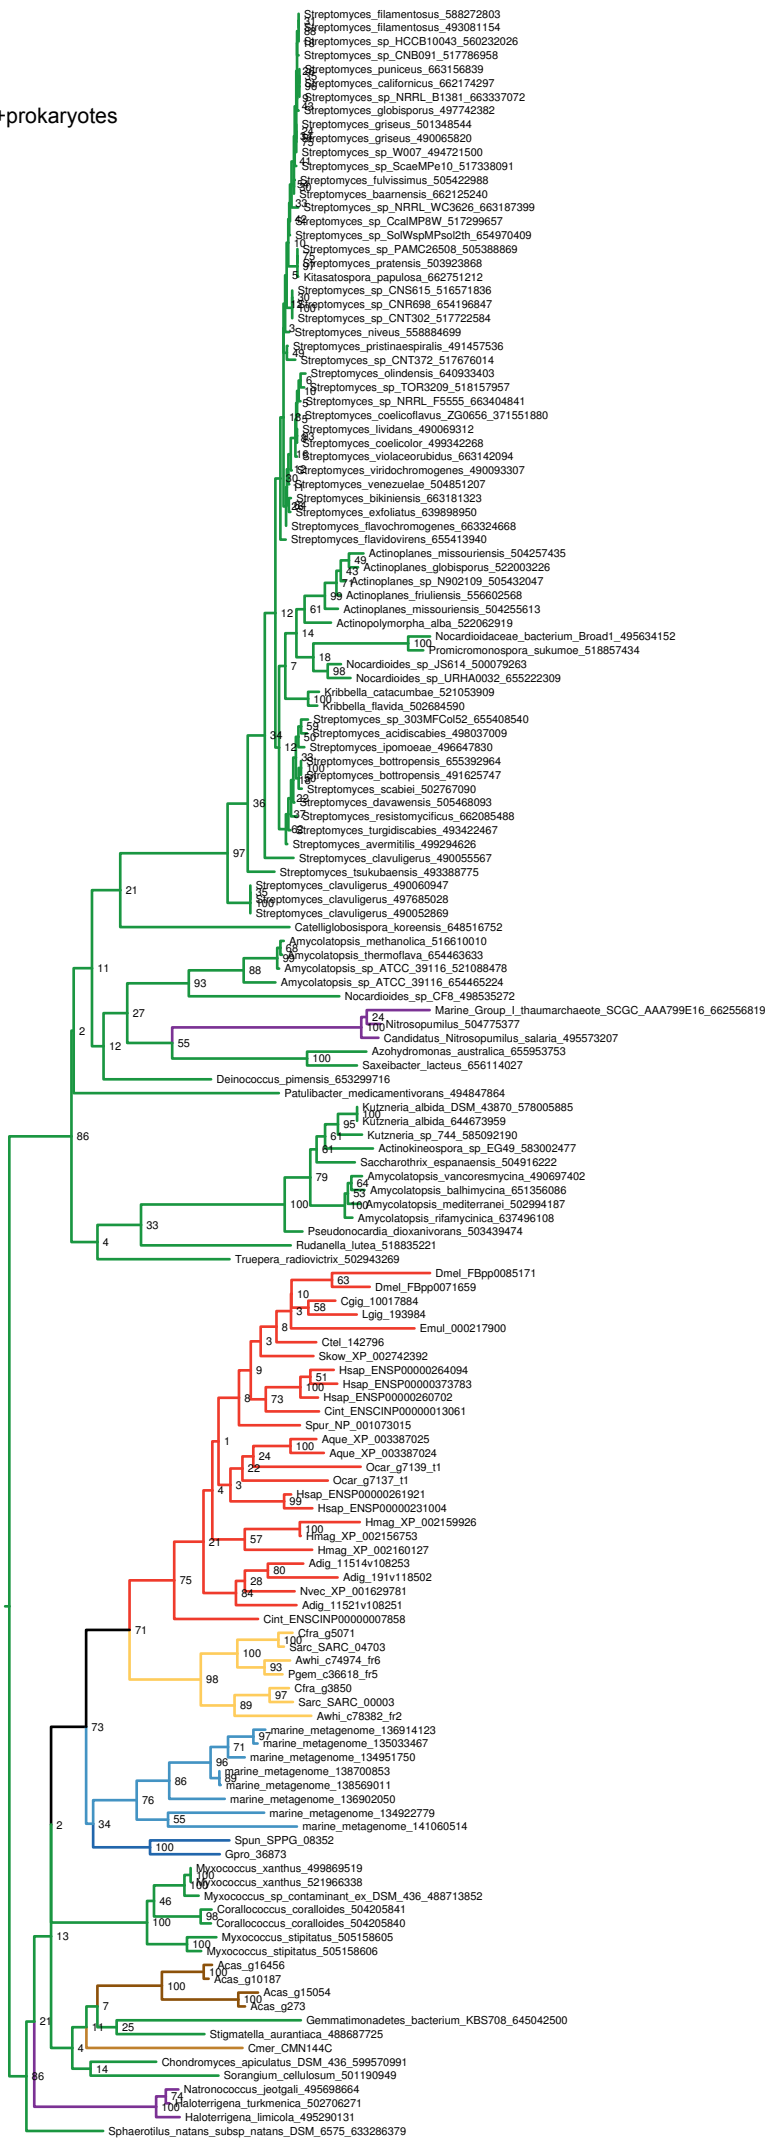

# Figure S2

BI 154 eukaryotes+prokaryotes

- Metazoa
- Ichthyospora
- Fungi
- Amoebozoa
- Rhodophyta
- Bacteria
- Archaea
- Metagenomic

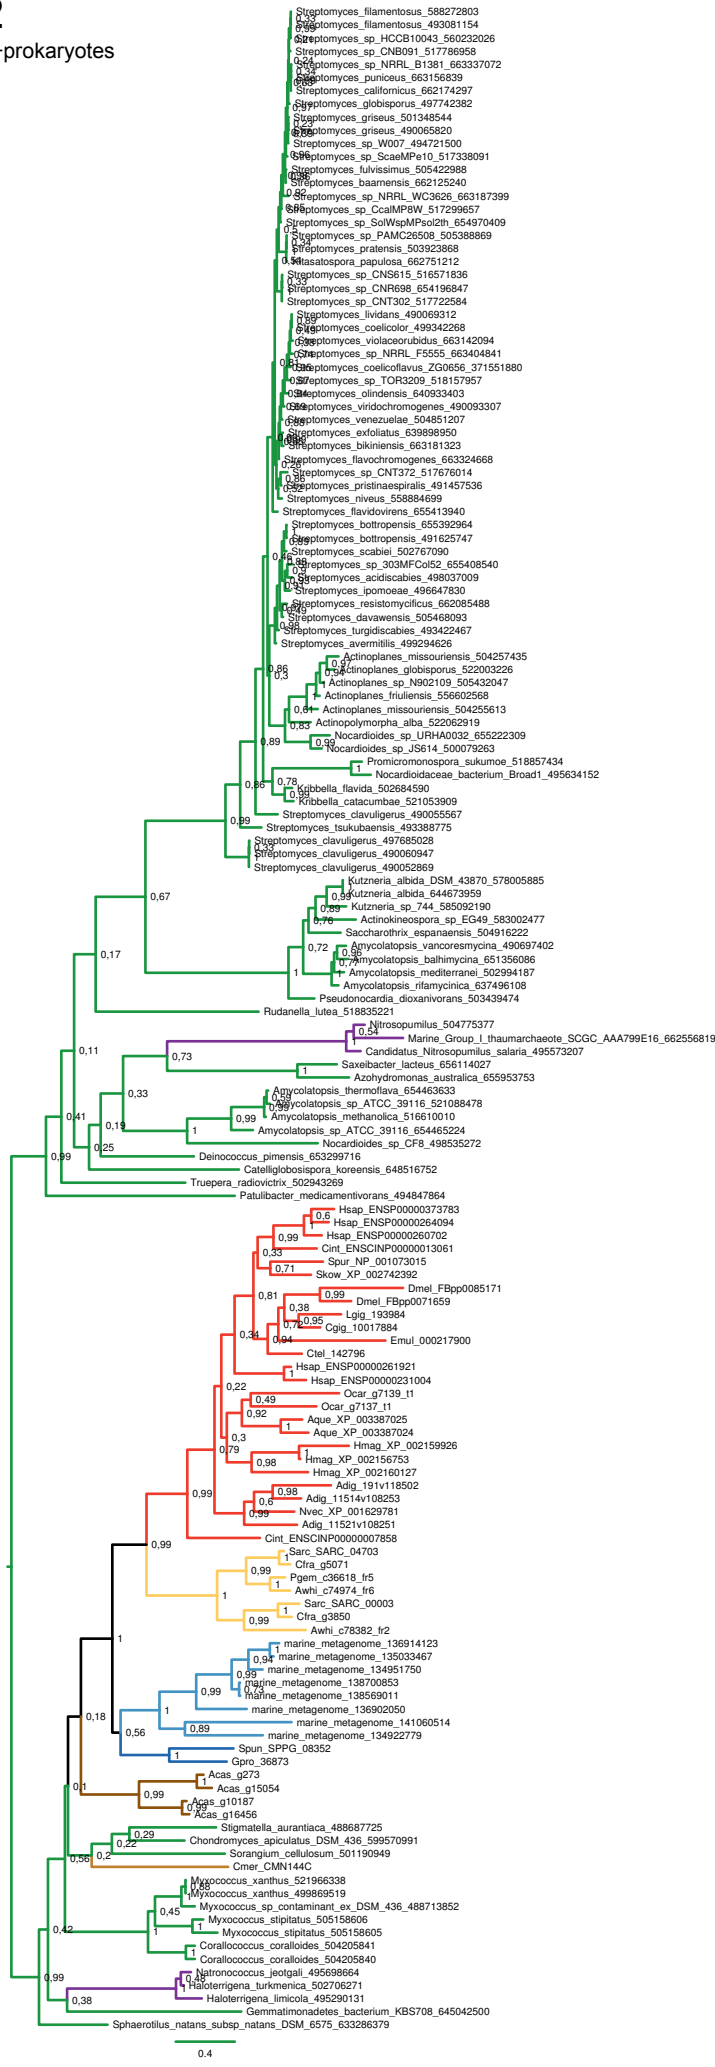



# Figure S3

ML 129 holozoans

- Vertebrates
- Tunicates, cephalochordates
- Ambulacraria
- Lophotrochozoa
- Arthropoda
- Cnidaria
- Porifera
- Ichthyosporea

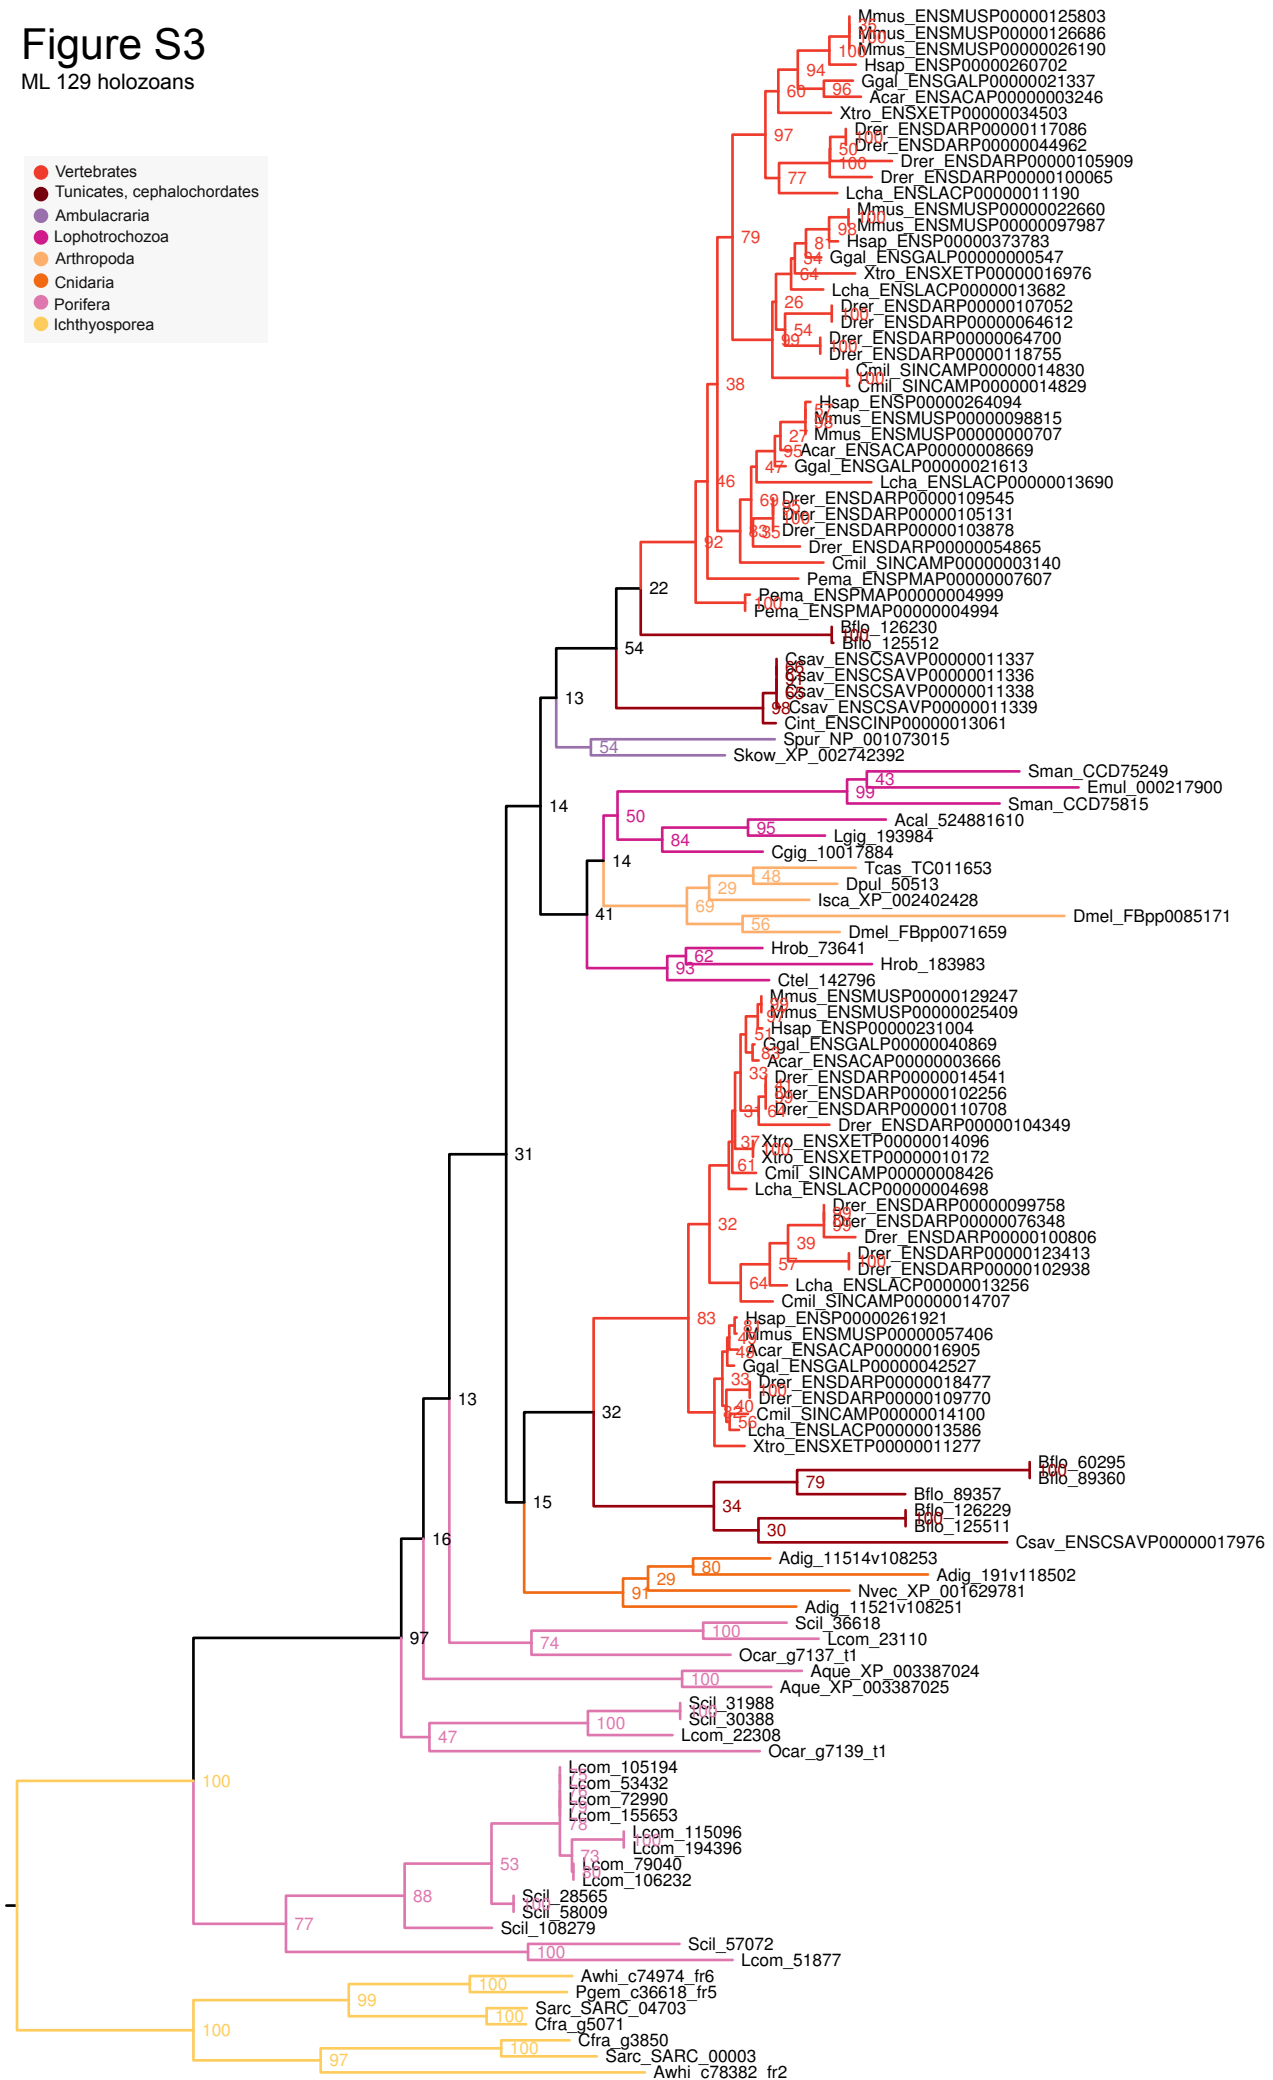

# Figure S4

BI 129 holozoans

- Vertebrates
- Tunicates, cephalochordates
- Ambulacraria
- Lophotrochozoa
- Arthropoda
- Cnidaria
- Porifera
- Ichthyosporia

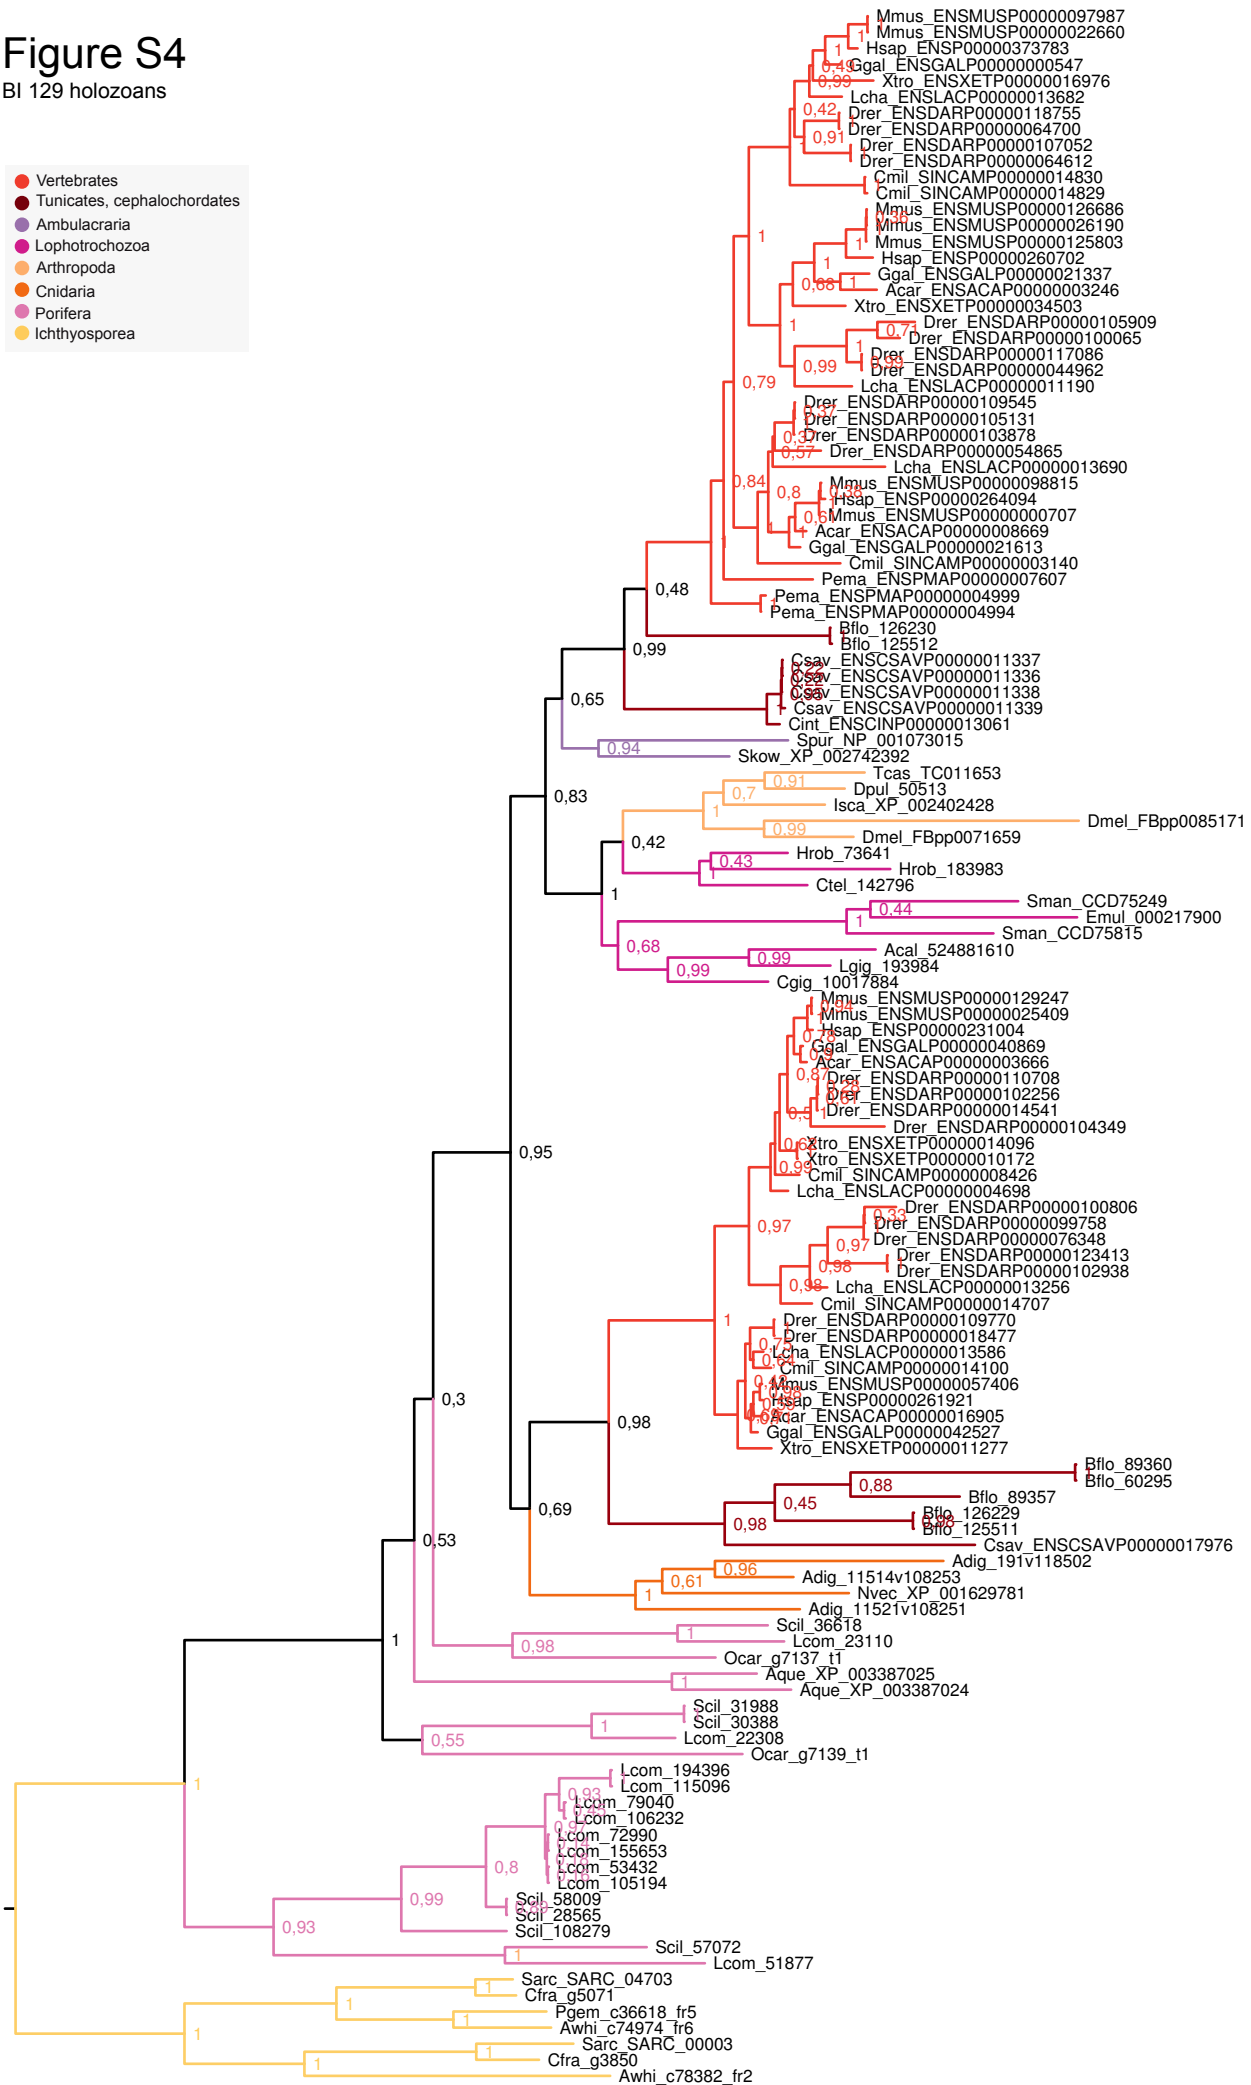

0.3
